# Supplementary material for: Pennate diatoms make Non Photochemical Quenching as simple as possible, but not simpler.
Source: Research Square preprint supplement (doi:10.21203/rs.3.rs-4547474/v1), 2024-06-27
Supplement: Supplementary file 1 [file fafa05aa1a5b89bca04d9d8d.xlsx]

## Sheet: Mean values
Strains	Growth Conditions	Rel. [Lhcx1]			Growth rate			FV/FM			σPSII			NPQM			E50NPQ			nNPQ			(NPQ-DES)ss			(NPQ-DT)ss			(NPQ-DES)relax			(NPQ-DT)relax
		mean	SD	n	mean	SD	n	mean	SD	n	mean	SD	n	mean	SD	n	mean	SD	n	mean	SD	n	mean	SD	n	mean	SD	n	mean	SD	n	mean	SD	n
Pt2	LL	0.0720131	0.0274189	4	0.30625	0.013351	4	0.682446	0.0312636	6	0.272567	0.00274651	3	1.33513	0.372864	5	227.314	70.2447	5	2.450 ± 0.110 (SE) Global fit (Origin software, OriginLab, Northampton, USA) for the 46 treatments because resolution around the light intensity of inflection was not dense enough for individual replicate fitting			0.0354677	0.00552175	3	1.04991	0.243632	3	0.0311239	0.00693105	4	0.909986	0.164813	4
Ko6	LL	0.0131697	0.00765811	4	0.3015	0.0232307	4	0.682917	0.042085	6	0.273567	0.00688864	3	0.802122	0.316496	5	646.863	311.763	5				0.00727353	0.00351741	3	0.187545	0.0953704	3	0.00457184	0.000481947	3	0.114504	0.0321594	3
LtpF	LL	0.039271	0.0347281	4	0.29975	0.00567891	4	0.68956	0.0198739	2	0.276033	0.0084002	3	0.661687	0.0602509	2	153.867	32.3986	2				NA			NA			NA			NA
LtpG	LL	0.11697	0.0427709	4	0.30525	0.0138173	4	0.680872	0.0182951	2	0.279467	0.00780021	3	2.28722	0.141852	2	157.863	11.8458	2				NA			NA			NA			NA
Ltpi	LL	0.0426486	0.0191721	4	0.3065	0.009	4	0.678549	0.0185807	2	0.281	0.00801686	3	0.812405	0.0447431	2	126.104	22.2513	2				NA			NA			NA			NA
LtpL	LL	0.097386	0.064588	4	0.28425	0.0118989	4	0.667868	0.0202547	2	0.297267	0.00552479	3	1.46528	0.0848499	2	149.161	8.38048	2				NA			NA			NA			NA
LtpM	LL	0.374761	0.0206705	4	0.28325	0.019906	4	0.670493	0.0260209	6	0.281233	0.0152504	3	5.63446	0.718191	5	263.298	69.9906	5				0.114546	0.0194986	3	2.1939	0.125205	3	0.110288	0.013128	4	1.94719	0.449878	4
LtpN	LL	0.0933893	0.0109379	4	0.29425	0.0136473	4	0.685187	0.0301795	6	0.284133	0.0050659	3	1.78164	0.339164	5	184.7	64.9165	5				0.0439312	0.00364137	3	0.937058	0.215567	3	0.0409577	0.00433759	3	1.03576	0.145239	3
LtpQ	LL	0.0791667	0.0520804	4	0.292	0.0198158	4	0.663768	0.0151929	2	0.276533	0.00324705	3	1.31892	0.07921	2	111.977	11.4633	2				NA			NA			NA			NA
LtpS	LL	0.0246679	0.0106925	4	0.30175	0.011644	4	0.669719	0.00957323	2	0.284833	0.00140119	3	0.678069	0.0458502	2	131.172	24.6896	2				NA			NA			NA			NA
LtpT	LL	0.00405341	0.0019328	2	0.29075	0.023585	4	0.678632	0.0238691	2	0.291433	0.00882345	3	0.660057	0.276677	2	634.964	186.956	2				NA			NA			NA			NA
LtpV	LL	0.00442138	0.00239944	2	0.28175	0.0174428	4	0.678201	0.0167623	2	0.284367	0.00388373	3	0.412076	0.0458106	2	189.096	55.333	2				NA			NA			NA			NA
LtpW	LL	0.345663	0.0579851	4	0.2845	0.00351188	4	0.672777	0.0200513	6	0.2847	0.0069419	3	5.07735	0.469851	5	219.762	62.6624	5				0.107153	0.00448147	3	2.06836	0.359163	3	0.100244	0.0205394	4	1.86801	0.399098	4
LtpY	LL	0.247052	0.0701329	4	0.2905	0.007	4	0.685024	0.0282545	6	0.2778	0.00362905	3	2.90218	0.296188	5	169.799	52.1532	5				0.0655384	0.0113997	3	1.31452	0.0997633	3	0.0690627	0.00712051	3	1.51178	0.153576	3
Pt2	IL	0.67622	0.242825	4	NA			0.638429	0.0150756	11	0.2629	0.00547449	3	7.11111	0.773141	5	531.364	45.5299	5	2.68668	0.242825	5	0.149979	0.00542534	3	1.54077	0.0474498	3	0.106212	0.0210127	5	1.10371	0.205166	5
Ko6	IL	0.0181965	0.0145781	4	NA			0.621682	0.0228618	10	0.235267	0.00375411	3	0.649322	0.104208	5	244.584	27.8486	5	2.56031	0.299907	5	0.0106454	0.00220557	3	0.118089	0.0255172	3	0.0114393	0.00162257	3	0.126964	0.0263881	3
LtpF	IL	0.165141	0.104569	4	NA			0.591589	0.0224163	10	NA			2.1893	0.185244	4	236.074	18.9388	4	3.74967	0.279288	4	0.0410868	0.00390894	2	0.450186	0.0469834	2	0.0474229	NA	1	0.512147	NA	1
LtpG	IL	0.482334	0.276148	4	NA			0.593517	0.0216282	8	NA			5.9351	0.0667415	2	395.896	18.5441	2	2.59963	0.250988	2	NA			NA			NA			NA
Ltpi	IL	0.198078	0.101339	4	NA			0.59361	0.0252263	10	0.2291	0.00581292	3	2.29317	0.208103	4	250.509	23.3809	4	3.6413	0.0997887	4	0.0447826	0.00339662	2	0.487314	0.019736	2	0.0484391	NA	1	0.536954		1
LtpL	IL	0.408872	0.214349	4	NA			0.619658	0.0155479	8	NA			5.16838	0.177601	2	462.687	34.0805	2	2.79661	0.251046	2	NA			NA			NA			NA
LtpM	IL	1	0.223398	4	NA			0.567693	0.0265933	11	0.237833	0.00281129	3	11.5446	0.785074	5	545.674	30.3324	5	2.1189	0.192071	5	0.207569	0.0115285	3	1.82812	0.11889	3	0.174911	0.0212996	5	1.50674	0.137286	5
LtpN	IL	0.475701	0.235099	4	NA			0.588517	0.0265147	11	0.2336	0.004	3	7.36934	0.672641	5	439.507	21.082	5	2.5507	0.184045	5	0.132458	0.00996308	3	1.35022	0.0804953	3	0.105505	0.0205828	4	1.04722	0.205449	4
LtpQ	IL	0.359966	0.198539	4	NA			0.59973	0.0211571	8	NA			5.00404	0.0504541	2	304.608	44.9618	2	2.91555	0.0757561	2	NA			NA			NA			NA
LtpS	IL	0.144893	0.135542	4	NA			0.589933	0.0233577	10	NA			1.63597	0.0896284	4	236.679	39.8593	4	3.89886	0.254518	4	0.0333428	0.00185825	2	0.373736	0.0335075	2	0.0340566	NA	1	0.38903	NA	1
LtpT	IL	0.00663344	0.00323648	4	NA			0.602088	0.0279072	8	NA			0.543905	0.018084	2	251.687	41.36	2	2.70133	0.231742	2	NA			NA			NA			NA
LtpV	IL	0.0226336	0.0196217	4	NA			0.605893	0.0281538	8	NA			0.592851	0.0290644	2	182.72	31.0768	2	3.59651	0.384266	2	NA			NA			NA			NA
LtpW	IL	0.842431	0.0563425	4	NA			0.570423	0.0151781	11	0.237967	0.00315013	3	11.1865	1.16465	5	585.175	94.2156	5	2.18457	0.160868	5	0.188434	0.0187418	3	1.68232	0.231403	3	0.128836	0.0215692	4	1.13093	0.145558	4
LtpY	IL	0.605562	0.266567	4	NA			0.586466	0.0180825	10	0.233367	0.00436157	3	8.82825	0.549438	5	467.231	59.9071	5	2.30269	0.24306	5	0.15042	0.0208696	3	1.38858	0.178664	3	0.149781	0.0439369	4	1.41712	0.38936	4
